# Supplementary material for: Identifying requisite learning health system competencies: a scoping review
Source: HighWire-hosted journal article supplement (doi:10.1136/bmjopen-2022-061124), 2022-08-01
Supplement: bmjopen-2022-061124supp002_data_supplement.pdf [file bmjopen-2022-061124supp002_data_supplement.pdf]

**Appendix 2: Data Points**

- Authors
- Publication Title
- Originating Discipline
- Article Type (consensus, empirical, framework, review, perspective)
- Level of Analysis (patient, health system worker, system)
- Publication Year
- Study Location (country)
- Study Type
- Intervention Type, if any
- Duration of intervention, if any
- Study Population
- Study Aims
- Methodology Overview
- Outcomes & Measures
- Results
- Patient Level Competencies Described
- Health System Worker Level Competencies Described
- System Level Competencies Described
- Contribution of Article to Understanding of Objectives
- Reviewer Notes
