# Supplementary material for: Identifying requisite learning health system competencies: a scoping review
Source: HighWire-hosted journal article supplement (doi:10.1136/bmjopen-2022-061124), 2022-08-01
Supplement: bmjopen-2022-061124supp003_data_supplement.pdf [file bmjopen-2022-061124supp003_data_supplement.pdf]

### **Appendix 3: Scoping Review Articles**

1. Bindman AB. Learning healthcare systems: a perspective from the US. *Public health research & practice*. 2019;29(3). <https://doi.org/10.17061/phrp2931920>
2. Brannon E, Wang T, Lapedis J, et al. Towards a Learning Health System to Reduce Emergency Department Visits at a Population Level. *AMIA Annu Symp Proc*. 2018;2018:295-304.
3. Flott K, Nelson D, Moorcroft T, et al. Enhancing Safety Culture Through Improved Incident Reporting: A Case Study In Translational Research. *Health Aff (Millwood)*. 2018;37(11):1797-804. doi:10.1377/hlthaff.2018.0706
4. Gardner W. Policy Capacity in the Learning Healthcare System Comment on "Health Reform Requires Policy Capacity". *International journal of health policy and management*. 2015;4(12):841-3. <https://doi.org/10.15171/ijhpm.2015.147>
5. Holm S, Ploug T. Big Data and Health Research—The Governance Challenges in a Mixed Data Economy. *Journal of bioethical inquiry*. 2017;14(4):515-25. <https://doi.org/10.1007/s11673-017-9810-0>
6. Lessard L, Michalowski W, Fung-Kee-Fung M, Jones L, Grudniewicz A. Architectural frameworks: defining the structures for implementing learning health systems. *Implementation science : IS*. 2017;12(1):78-. <https://doi.org/10.1186/s13012-017-0607-7>
7. Marsolo K. In Search of a Data-in-Once, Electronic Health Record-Linked, Multicenter Registry-- How Far We Have Come and How Far We Still Have to Go. *eGEMs (Generating Evidence & Methods to improve patient outcomes)*. 2013;1(1):1003-. <https://doi.org/10.13063/2327-9214.1003>
8. Mathews S, Golden S, Demski R, Pronovost P, Ishii L. Advancing health care quality and safety through action learning. *Leadership in health services (2007)*. 2017;30(2):148-58. <https://doi.org/10.1108/lhs-10-2016-0051>
9. Morain SR, Majumder MA, McGuire AL. Learning Health System - Moving from Ethical Frameworks to Practical Implementation. *J Law Med Ethics*. 2019;47(3):454-8. <https://doi.org/10.1177/1073110519876180>
10. Sadler E, Porat T, Marshall I, et al. Shaping innovations in long-term care for stroke survivors with multimorbidity through stakeholder engagement. *PloS one*. 2017;12(5):e0177102-e. <https://doi.org/10.1371/journal.pone.0177102>
11. Teare GF, Keller M, Hall D. Bringing Together Research and Quality Improvement: The Saskatchewan Approach. *Healthc Q*. 2018;21(Sp):56-60. <https://doi.org/10.12927/hcq.2018.25637>

12. Van Royen P, Rees CE, Groenewegen P. Patient-centred interprofessional collaboration in primary care: challenges for clinical, educational and health services research. An EGPRN keynote paper. *The European journal of general practice*. 2014;20(4):327-32. <https://doi.org/10.3109/13814788.2014.908462>
13. Wulff A, Marschollek M. Learning Healthcare Systems in Pediatrics: Cross-Institutional and Data-Driven Decision-Support for Intensive Care Environments (CADDIE). *Stud Health Technol Inform*. 2018;251:109-12.
14. Cahan A, Cimino JJ. A Learning Health Care System Using Computer-Aided Diagnosis. *Journal of medical Internet research*. 2017;19(3):e54-e. <https://doi.org/10.2196/jmir.6663>
15. Deeny SR, Steventon A. Making sense of the shadows: priorities for creating a learning healthcare system based on routinely collected data. *BMJ quality & safety*. 2015;24(8):505-15. <https://doi.org/10.1136/bmjqs-2015-004278>
16. Gaveikaite V, Filos D, Schonenberg H, van der Heijden R, Maglaveras N, Chouvarda I. Learning Healthcare Systems: Scaling-Up Integrated Care Programs. *Studies in health technology and informatics*. 2018;247:825-9.
17. Gonzalo JD, Thompson BM, Haidet P, Mann K, Wolpaw DR. A Constructive Reframing of Student Roles and Systems Learning in Medical Education Using a Communities of Practice Lens. *Academic medicine*. 2017;92(12):1687-94. <https://doi.org/10.1097/acm.0000000000001778>
18. Jagsi R, Griffith KA, Jones RD, et al. Effect of Public Deliberation on Patient Attitudes Regarding Consent and Data Use in a Learning Health Care System for Oncology. *Journal of clinical oncology*. 2019;37(34):3203-11. <https://doi.org/10.1200/jco.19.01693>
19. Kim KK, Sankar P, Wilson MD, Haynes SC. Factors affecting willingness to share electronic health data among California consumers. *BMC medical ethics*. 2017;18(1):25. <https://doi.org/10.1186/s12910-017-0185-x>
20. Lee DJ, Ding J, Guzzo TJ. Improving Operating Room Efficiency. *Current urology reports*. 2019;20(6):1-8. <https://doi.org/10.1007/s11934-019-0895-3>
21. Budrionis A, Bellika JG. *J Biomed Inform*. The Learning Healthcare System: Where are we now? A systematic review. 2016;64:87-92. <https://doi.org/10.1016/j.jbi.2016.09.018>
22. Etheredge LM. A Rapid-Learning Health System. *Health Affairs*. 2007;26(2): w107-w18. <https://doi.org/10.1377/hlthaff.26.2.w107>
23. Forrest CB, Chesley FD, Tregear ML, Mistry KB. Development of the Learning Health System Researcher Core Competencies. *Health services research*. 2018;53(4):2615-32. <https://doi.org/10.1111/1475-6773.12751>

24. Fore D, Goldenhar LM, Margolis PA, Seid M. Using goal-directed design to create a novel system for improving chronic illness care. *JMIR research protocols*. 2013;2(2): e43. <https://doi.org/10.2196/resprot.2749>
25. Kumar S, Hanss T, Johnson L, et al. Leveraging Contextual Inquiry Methods to Empower Patients in a Learning Health System. 2015. p. 3141-7. <https://doi.org/10.1109/HICSS.2015.379>
26. Galvin HK, Petersen C, Subbian V, Solomonides A. Patients as Agents in Behavioral Health Research and Service Provision: Recommendations to Support the Learning Health System. *Applied Clinical Informatics*. 2019;10(5):841-8. <https://doi.org/10.1055/s-0039-1700536>
27. Cipriano PF. The importance of knowledge-based technology. *Nursing administration quarterly*. 2012;36(2):136-46. <https://doi.org/10.1097/NAQ.0b013e31824a004c>
28. Greenberg-Worisek AJ, Shippee ND, Schaffhausen C, et al. The Learning Health System Competency Appraisal Inventory (LHS-CAD): A novel tool for assessing LHS-focused education needs. *Learning Health Systems*. 2020. <https://doi.org/10.1002/lrh2.10218>
29. Hsu ER, Klemm JD, Kerlavage AR, Kusnezov D, Kibbe WA. Cancer Moonshot Data and Technology Team: Enabling a National Learning Healthcare System for Cancer to Unleash the Power of Data. *Clinical pharmacology and therapeutics*. 2017;101(5):613-5. <https://doi.org/10.1002/cpt.636>
30. Krumholz HM. Big data and new knowledge in medicine: the thinking, training, and tools needed for a learning health system. *Health affairs Web exclusive*. 2014;33(7):1163-70. <https://doi.org/10.1377/hlthaff.2014.0053>
31. Irimu G, Ogero M, Mbevi G, et al. Approaching quality improvement at scale: a learning health system approach in Kenya. *Arch Dis Child*. 2018;103(11):1013-9. <https://doi.org/10.1136/archdischild-2017-314348>
32. Lannon CM, Peterson LE. Pediatric collaborative improvement networks: background and overview. *Pediatrics (Evanston)*. 2013;131 Suppl 4(Supplement): S189-S95. <https://doi.org/10.1542/peds.2012-3786E>
33. McLachlan S, Dube K, Johnson O, et al. A framework for analysing learning health systems: Are we removing the most impactful barriers? *Learning Health Systems*. 2019;3(4). <https://doi.org/10.1002/lrh2.10189>
34. Newhouse RP. Nursing's Role in Engineering a Learning Healthcare System. *The Journal of nursing administration*. 2009;39(6):260-2. <https://doi.org/10.1097/NNA.0b013e3181a7293e>

35. Satterfield K, Rubin JC, Yang D, Friedman CP. Understanding the roles of three academic communities in a prospective learning health ecosystem for diagnostic excellence. *Learning Health Systems*. 2020;4(1). <https://doi.org/10.1002/lrh2.10204>
36. Scobie S, Castle-Clarke S. Implementing learning health systems in the UK NHS: Policy actions to improve collaboration and transparency and support innovation and better use of analytics. *Learning Health Systems*. 2020;4(1). <https://doi.org/10.1002/lrh2.10209>
37. Liu VX, Morehouse JW, Baker JM, Greene JD, Kipnis P, Escobar GJ. Data that drive: Closing the loop in the learning hospital system. *Journal of hospital medicine*. 2016;11(S1): S11-S7. <https://doi.org/10.1002/jhm.2651>
38. Reid RJ. Embedding Research in the Learning Health System. *HealthcarePapers* (Toronto). 2016;16(SP):30-5. <https://doi.org/10.12927/hcpap.2016.24724>
39. Christensen V, Floyd N, Anderson J. It Would've Been Nice if They Interpreted the Data a Little Bit. It Didn't Really Say Much, and It Didn't Really Help Us.": A Qualitative Study of VA Health System Evidence Needs. *Medical Care*. 2019;57: S228-S32. <https://doi.org/10.1097/MLR.0000000000001171>
40. Kilbourne AM, Goodrich DE, Miake-Lye I, Braganza MZ, Bowersox NW. Quality Enhancement Research Initiative Implementation Roadmap: Toward Sustainability of Evidence-based Practices in a Learning Health System. *Medical Care*. 2019;57: S286-S93. <https://doi.org/10.1097/MLR.0000000000001144>
41. Hemingway H, Asselbergs FW, Danesh J, et al. Big data from electronic health records for early and late translational cardiovascular research: Challenges and potential. *European heart journal*. 2018;39(16):1481-95. <https://doi.org/10.1093/eurheartj/ehx487>
42. Harper E. Can big data transform electronic health records into learning health systems? *Studies in health technology and informatics*. 2014; 201:470-5.
43. Felkey BG, Fox BI. Are you Practicing in a Learning Health System? *Hospital pharmacy* (Philadelphia). 2017;52(1):82-4. <https://doi.org/10.1310/hpj5201-82>
44. McNutt TR, Benedict SH, Low DA, et al. Using Big Data Analytics to Advance Precision Radiation Oncology. *International journal of radiation oncology, biology, physics*. 2018;101(2):285-91. <https://doi.org/10.1016/j.ijrobp.2018.02.028>
45. Finkelstein J, Zhang F, Levitin SA, Cappelli D. Using big data to promote precision oral health in the context of a learning healthcare system. *Journal of Public Health Dentistry*. 2020;80(S1): S43-S58. <https://doi.org/10.1111/jphd.12354>
46. Peng DM, Rosenthal DN, Zafar F, Smyth L, VanderPluym CJ, Lorts A. Collaboration and new data in ACTION: a learning health care system to improve pediatric heart failure

- and ventricular assist device outcomes. *Transl Pediatr.* 2019;8(4):349-55.  
<https://doi.org/10.21037/tp.2019.07.12>
47. Kaboli PJ, Miake-Lye IM, Ruser C, et al. Sequelae of an Evidence-based Approach to Management for Access to Care in the Veterans Health Administration. *Medical Care.* 2019;57: S213-S20. <https://doi.org/10.1097/MLR.0000000000001177>
48. Joda T, Waltimo T, Probst-Hensch N, Pauli-Magnus C, Zitzmann NU. Health Data in Dentistry: An Attempt to Master the Digital Challenge. *Public Health Genomics.* 2019;22(1-2):1-7. <https://doi.org/10.1159/000501643>
49. Friedman CP, Rubin JC, Sullivan KJ. Toward an Information Infrastructure for Global Health Improvement. *Yearbook of medical informatics.* 2017;26(1):16-23.  
<https://doi.org/10.15265/IY-2017-004>
50. English M, Irimu G, Agweyu A, et al. Building Learning Health Systems to Accelerate Research and Improve Outcomes of Clinical Care in Low- and Middle-Income Countries. *PLoS medicine.* 2016;13(4): e1001991-e. <https://doi.org/10.1371/journal.pmed.1001991>
51. Elnahal SM, Clancy CM, Shulkin DJ. A Framework for Disseminating Clinical Best Practices in the VA Health System. *JAMA: the journal of the American Medical Association.* 2017;317(3):255-6. <https://doi.org/10.1001/jama.2016.18764>
52. Williams MS, Buchanan AH, Davis FD, et al. Patient-Centered Precision Health in A Learning Health Care System: Geisinger's Genomic Medicine Experience. *Health affairs Web exclusive.* 2018;37(5):757-64. <https://doi.org/10.1377/hlthaff.2017.1557>
53. Ovretveit J, Nelson E, James B. Building a learning health system using clinical registers: a non-technical introduction. *Journal of health organization and management.* 2016;30(7):1105-18. <https://doi.org/10.1108/JHOM-06-2016-0110>
54. Reams C, Edwards R, Powell M. State Synergies and Disease Surveillance: Creating an Electronic Health Data Communication Model for Cancer Reporting and Comparative Effectiveness Research in Kentucky. *eGEMs (Generating Evidence & Methods to improve patient outcomes).* 2014;2(2):1064. <https://doi.org/10.13063/2327-9214.1064>
55. Lai J, Klag M, Shikako-Thomas K. Designing a program evaluation for a medical-dental service for adults with autism and intellectual disabilities using the RE-AIM framework. *Learning Health Systems.* 2019;3(3). <https://doi.org/10.1002/lrh2.10192>
56. Delaney BC, Peterson KA, Speedie S, Taweel AP, Arvanitis TN, Hobbs FDR. Envisioning a Learning Health Care System: The Electronic Primary Care Research Network, A Case Study. *Annals of family medicine.* 2012;10(1):54-9.  
<https://doi.org/10.1370/afm.1313>

57. Lovestone S. The European medical information framework: A novel ecosystem for sharing healthcare data across Europe. *Learn Health Syst.* 2020;4(2): e10214. <https://doi.org/10.1002/lrh2.10214>
58. Friedman C, Rigby M. Conceptualising and creating a global learning health system. *International journal of medical informatics (Shannon, Ireland).* 2012;82(4): e63-e71. <https://doi.org/10.1016/j.ijmedinf.2012.05.010>
59. Braunstein ML, Detmer D. Interoperable informatics for health enterprise transformation. *Journal of Enterprise Transformation.* 2016;6(3-4):110-9. <https://doi.org/10.1080/19488289.2016.1254692>
60. Tabano DC, Cole E, Holve E, Davidson AJ. Distributed Data Networks That Support Public Health Information Needs. *Journal of public health management and practice.* 2017;23(6):674-83. <https://doi.org/10.1097/PHH.0000000000000614>
61. Colicchio TK, Del Fiol G, Cimino JJ. Health information technology as a learning health system: Call for a national monitoring system. *Learning Health Systems.* 2020;4(1). <https://doi.org/10.1002/lrh2.10207>
62. Woody SK, Burdick D, Lapp H, Huang ES. Application programming interfaces for knowledge transfer and generation in the life sciences and healthcare. *NPJ Digit Med.* 2020; 3:24. <https://doi.org/10.1038/s41746-020-0235-5>
63. Harrison MI, Shortell SM. Multi-level analysis of the learning health system: Integrating contributions from research on organizations and implementation. *Learning Health Systems.* 2020. <https://doi.org/10.1002/lrh2.10226>
64. Davis FD, Williams MS, Stametz RA. Geisinger's effort to realize its potential as a learning health system: A progress report. *Learning Health Systems.* 2020. <https://doi.org/10.1002/lrh2.10221>
65. Yang UC, Hsiao TH, Lin CH, Lee WJ, Lee YS, Fann YC. Integrative LHS for precision medicine research: A shared NIH and Taiwan CIMS experience. *Learning Health Systems.* 2019;3(1). <https://doi.org/10.1002/lrh2.10071>
66. Fiuzat M, Califf RM. The US Food and Drug Administration and the Future of Cardiovascular Medicine. *JAMA cardiology.* 2016;1(8):950-2. <https://doi.org/10.1001/jamacardio.2016.2580>
67. Friedman CP, Wong AK, Blumenthal D. Achieving a nationwide learning health system. *Science translational medicine.* 2010;2(57):57cm29-57cm29. <https://doi.org/10.1126/scitranslmed.3001456>
68. Lu CY, Williams MS, Ginsburg GS, Toh S, Brown JS, Khoury MJ. A proposed approach to accelerate evidence generation for genomic-based technologies in the context of a

- learning health system. *Genetics in medicine*. 2018;20(4):390-6.  
<https://doi.org/10.1038/gim.2017.122>
69. Brown JS, Kahn M, Toh D. Data Quality Assessment for Comparative Effectiveness Research in Distributed Data Networks. *Medical care*. 2013;51(8 Suppl 3): S22-S9.  
<https://doi.org/10.1097/MLR.0b013e31829b1e2c>
70. Harris JG, Bingham CA, Morgan EM. Improving care delivery and outcomes in pediatric rheumatic diseases. *Current opinion in rheumatology*. 2016;28(2):110-6.  
<https://doi.org/10.1097/BOR.000000000000257>
71. Wysham NG, Abernethy AP, Cox CE. Setting the vision: applied patient-reported outcomes and smart, connected digital healthcare systems to improve patient-centered outcomes prediction in critical illness. *Current opinion in critical care*. 2014;20(5):566-72. <https://doi.org/10.1097/MCC.000000000000139>
72. Kaggal VC, Elayavilli RK, Mehrabi S, et al. Toward a Learning Health-care System - Knowledge Delivery at the Point of Care Empowered by Big Data and NLP. *Biomedical informatics insights*. 2016;2016(Suppl. 1):13-22. <https://doi.org/10.4137/BII.S37977>
73. Margolis PA, Peterson LE, Seid M. Collaborative Chronic Care Networks (C3Ns) to transform chronic illness care. *Pediatrics (Evanston)*. 2013;131 Suppl 4(Supplement): S219-S23. <https://doi.org/10.1542/peds.2012-3786J>
74. Cumyn A, Barton A, Dault R, Cloutier AM, Jalbert R, Ethier JF. Informed consent within a learning health system: A scoping review. *Learn Health Syst*. 2020;4(2): e10206.  
<https://doi.org/10.1002/lrh2.10206>
75. Finlayson SG, Levy M, Reddy S, Rubin DL. Toward rapid learning in cancer treatment selection: An analytical engine for practice-based clinical data. *J Biomed Inform*. 2016; 60:104-13. <https://doi.org/10.1016/j.jbi.2016.01.005>
76. Seid M, Hartley DM, Dellal G, Myers S, Margolis PA. Organizing for collaboration: An actor-oriented architecture in ImproveCareNow. *Learning Health Systems*. 2020;4(1).  
<https://doi.org/10.1002/lrh2.10205>
77. Richesson RL, Horvath MM, Rusincovitch SA. Clinical Research Informatics and Electronic Health Record Data. *Yearbook of medical informatics*. 2014;23(1):215-23.  
<https://doi.org/10.15265/IY-2014-0009>
78. Richardson JE, Middleton B, Platt JE, Blumenfeld BH. Building and maintaining trust in clinical decision support: Recommendations from the Patient-Centered CDS Learning Network. *Learn Health Syst*. 2020;4(2): e10208. <https://doi.org/10.1002/lrh2.10208>
79. McLachlan S, Dube K, Kyrimi E, Fenton N. LAGOS: Learning health systems and how they can integrate with patient care. *BMJ Health and Care Informatics*. 2019;26(1).  
<https://doi.org/10.1136/bmjhci-2019-100037>



80. Rangachari P, Dellsperger KC, Karl Rethemeyer R. A qualitative study of interprofessional learning related to electronic health record (EHR) medication reconciliation within a social knowledge networking (SKN) system. *Journal of Healthcare Leadership*. 2019; 11:23-41. <https://doi.org/10.2147/JHL.S198951>
81. Borsky AE, Flores EJ, Berliner E, Chang C, Umscheid CA, Chang SM. Next steps in improving healthcare value: AHRQ evidence-based practice center program-applying the knowledge to practice to data cycle to strengthen the value of patient care. *Journal of Hospital Medicine*. 2019;14(5):311-4. <https://doi.org/10.12788/jhm.3157>
82. Greene SM, Reid RJ, Larson EB. Implementing the Learning Health System: From Concept to Action. *Annals of internal medicine*. 2012;157(3):207-10. <https://doi.org/10.7326/0003-4819-157-3-201208070-00012>
83. Solomon MZ, Gusmano MK, Maschke KJ. The Ethical Imperative and Moral Challenges of Engaging Patients and The Public with Evidence. *Health affairs Web exclusive*. 2016;35(4):583-9. <https://doi.org/10.1377/hlthaff.2015.1392>
84. Platt JE, Jacobson PD, Kardia SLR. Public Trust in Health Information Sharing: A Measure of System Trust. *Health services research*. 2018;53(2):824-45. <https://doi.org/10.1111/1475-6773.12654>
85. Gilmartin HM, Hess E, Mueller C, Plomondon ME, Waldo SW, Battaglia C. A pilot study to assess the learning environment and use of reliability enhancing work practices in VHA cardiac catheterization laboratories. *Learning Health Systems*. 2020. <https://doi.org/10.1002/lrh2.10227>
86. Kaushal R, Hripcsak G, Ascheim DD, et al. Changing the research landscape: the New York City Clinical Data Research Network. *Journal of the American Medical Informatics Association: JAMIA*. 2014;21(4):587-90. <https://doi.org/10.1136/amiajnl-2014-002764>
87. Ethier JF, Curcin V, Barton A, et al. Clinical data integration model. Core interoperability ontology for research using primary care data. *Methods of information in medicine*. 2015;54(1):16-23. doi:10.3414/ME13-02-0024
88. Friedman CP, Donaldson KM, Vantsevich AV. Educating medical students in the era of ubiquitous information. *Medical teacher*. 2016;38(5):504-509. doi:10.3109/0142159X.2016.1150990
89. Medicine I of, Care R on V and SDH, McGinnis JM, et al. Clinical Data as the Basic Staple of Health Learning: Creating and Protecting a Public Good: Workshop Summary. National Academies Press; 2011. doi:10.17226/12212
